# Supplementary material for: 6-Gingerol Ameliorates Hepatic Steatosis, Inflammation and Oxidative Stress in High-Fat Diet-Fed Mice through Activating LKB1/AMPK Signaling
Source: MDPI journal article supplement (doi:10.3390/ijms24076285), 2023-03-27
Supplement: s1 [file s1]

## Supplementary Materials for

### 6-Gingerol Ameliorates Hepatic Steatosis and Oxidative Stress in High-Fat Diet-Fed Mice through Strengthening LKB1/STRAD/MO25 Complex Stability to activate LKB1/AMPK Pathway

Table S1. Primers used in RT-qPCR analysis.

| Gene           | Forward primer (5'→3')  | Reverse primer (5'→3') |
|----------------|-------------------------|------------------------|
| <i>Acaca</i>   | TGAAGCTGGACCTAGAAGAGA   | AGGCCAAACCATCCTGTAAG   |
| <i>Actb</i>    | GTGCTATGTTGCTCTAGACTTCG | ATGCCACAGGATTCCATACC   |
| <i>Cpt1a</i>   | CTGCACTCCTGGAAGAAGAAG   | CACCCACCACCACGATAAG    |
| <i>Fasn</i>    | CTCATTGGTGGTGTGTGGACAT  | TTGGAGAGATCCTTCAGCTTTC |
| <i>Ppara</i>   | CTGTCTGGGATGTCACACAAT   | CAGGTCGTGTTACAGGTAAG   |
| <i>Pgcl1</i>   | CCCAGATCTTCCTGAACCTTGAC | ATTGGTCGCTACACCACTTC   |
| <i>Scd1</i>    | AGAAGACATCCGTCCTGAAATG  | CAGCAGGACCATGAGAATGAT  |
| <i>Srebflc</i> | AGAAGACATCCGTCCTGAAATG  | CAGCAGGACCATGAGAATGAT  |

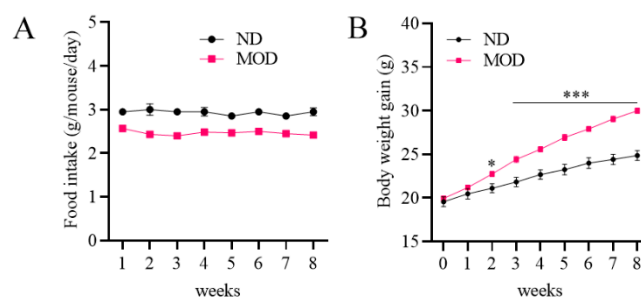

**Figure S1.** (A) Food intake and (B) Body weight gain during modeling (recorded once a week). \* $p < 0.05$  and \*\*\* $p < 0.001$ , compared with the ND group.

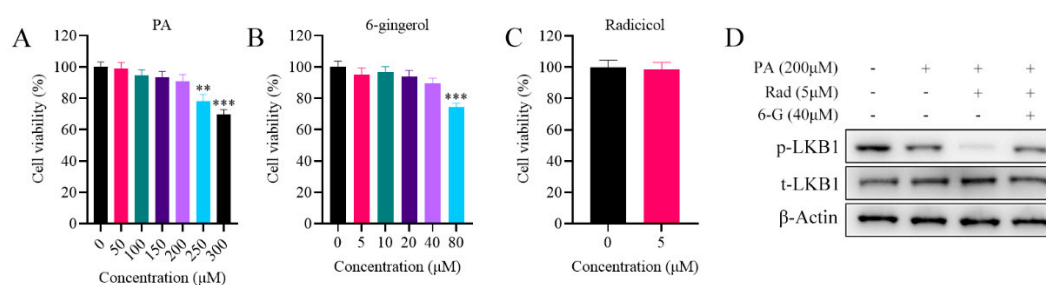

**Figure S2.** Cell viability under treatments with different concentrations of (A) PA (0μM, 50μM, 100μM, 150μM, 200μM, 250μM, 300μM) and (B) 6-gingerol (0μM, 5μM, 10μM, 20μM, 40μM and 80μM) and (C) 5μM Radicicol. Mean ± SEM. (D) Protein expressions of p-LKB1 and t-LKB1 in HepG2 cells by western blotting. \*\* $p < 0.01$  and \*\*\* $p < 0.001$ , compared with the 0μM group.
